# Supplementary material for: Controlled synthesis of Au-loaded Fe3O4@C composite microspheres with superior SERS detection and catalytic degradation abilities for organic dyes
Source: Royal Society of Chemistry journal article supplement (doi:10.1039/c3dt50341k), 2013-01-01
Supplement: c3dt50341k.pdf [file c3dt50341k.pdf]

## Supporting Information

Controlled synthesis of Au-loaded  $\text{Fe}_3\text{O}_4@\text{C}$  composite microspheres with superior SERS detection and catalytic degradation abilities for organic dyes

Zibao Gan<sup>a,b,c</sup>, Aiwu Zhao<sup>\*a,b,c</sup>, Maofeng Zhang<sup>a</sup>, Wenyu Tao<sup>a,b</sup>, Hongyan Guo<sup>a</sup>, Qian Gao<sup>a</sup>,  
Ranran Mao<sup>a,b</sup>, Erhu Liu<sup>a,b</sup>

*a. Institute of Intelligent Machines, Chinese Academy of Sciences, Hefei 230031, PR China*

*b. Department of Chemistry, University of Science and Technology of China, Hefei 230026, Anhui, PR China*

*c. State Key Laboratory of Transducer Technology, Chinese Academy of Sciences, Hefei 230031, PR China*

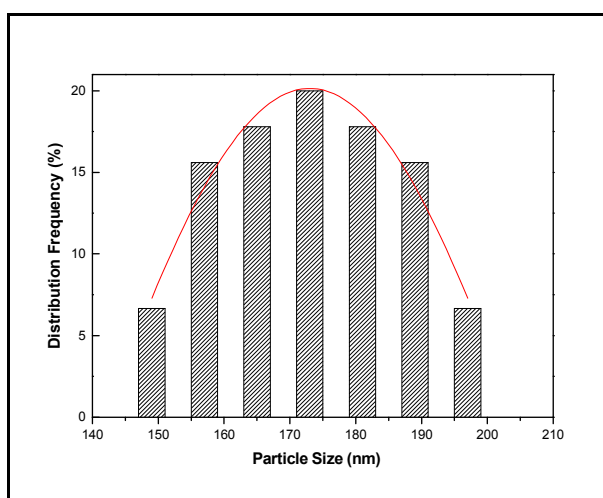

**Fig. S1** The histogram of particle size distribution for  $\text{Fe}_3\text{O}_4@\text{C}$  microspheres.

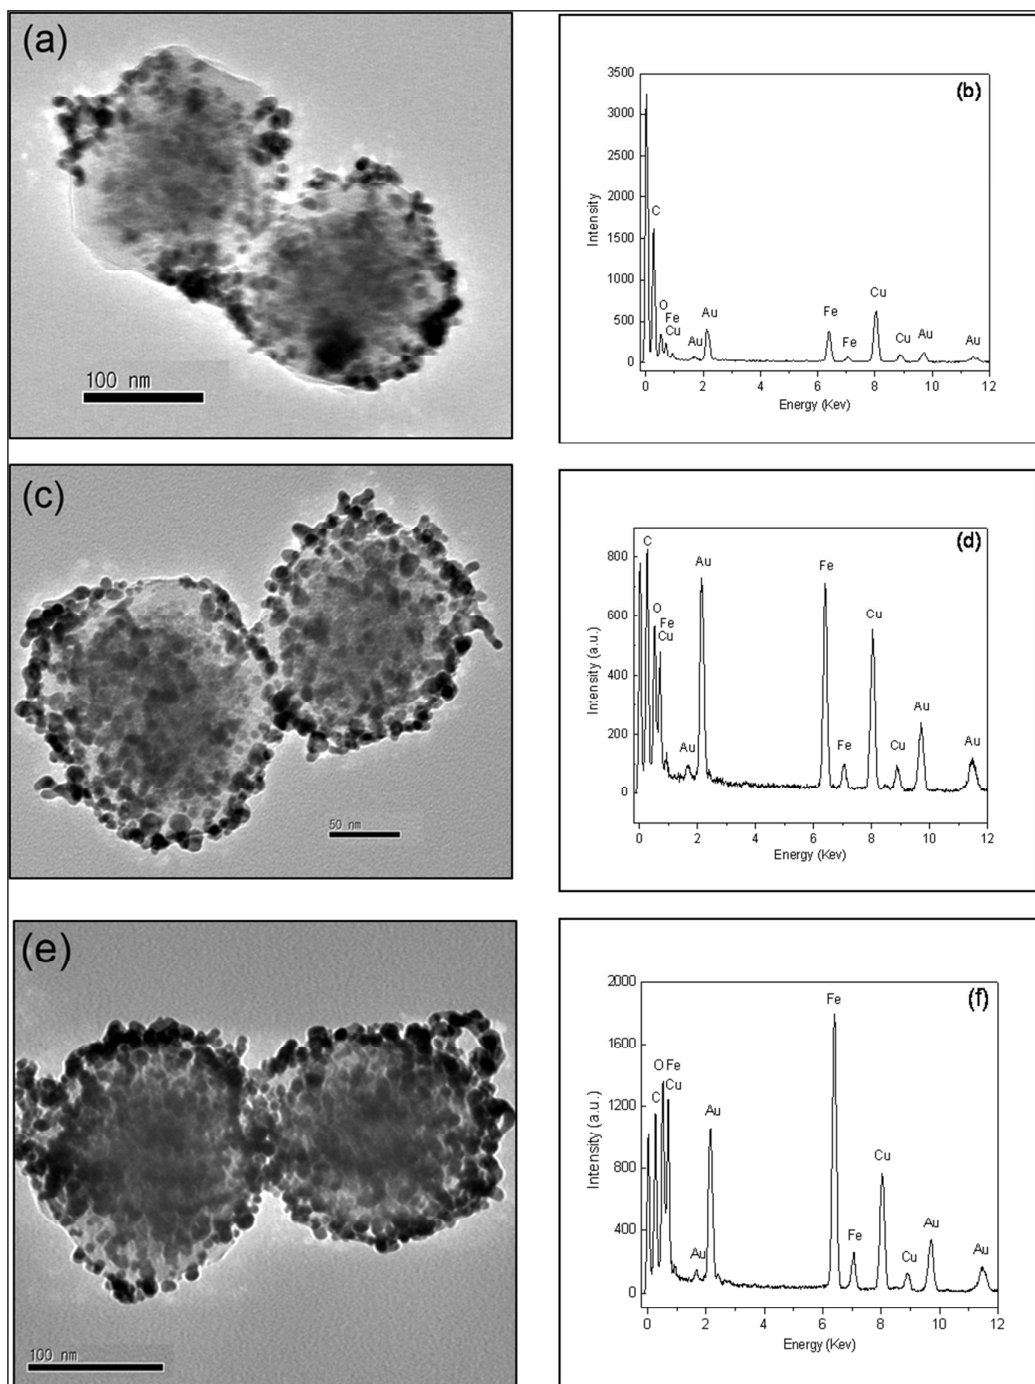

Fig. S2 TEM images and EDS datas of Au-loaded  $\text{Fe}_3\text{O}_4@\text{C}$  composite microspheres prepared with different feeding amount of solutions of Au NPs (a-b)30 mL, (c-d) 40 mL, (e-f) 50 mL.
